# Supplementary material
Source: Springer Nature journal article supplement (https://www.springermedizin.de/resource/supplementary/12947_2012_435_MOESM4_ESM.pdf/9555742)
Supplement: MOESM4 [file 9555742]

**A**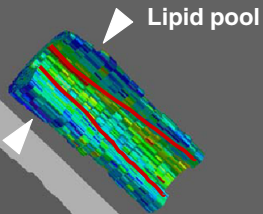

Lipid pool    Fibrosis    CL

**B**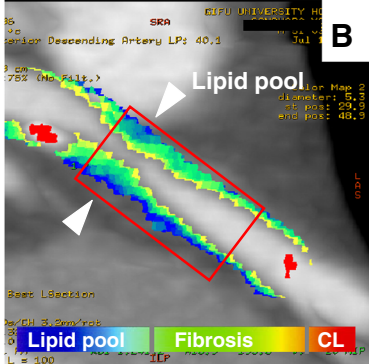

Lipid pool    Fibrosis    CL

**C**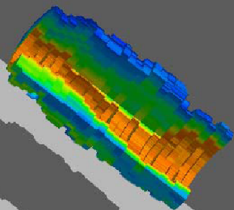

Lipid pool    Fibrosis    CL

**D**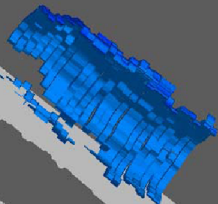

Lipid pool    Fibrosis    CL
